# Supplementary material
Source: ML conference proceedings conference paper supplement (https://www.ecva.net/papers/eccv_2020/papers_ECCV/html/123550494_ECCV_2020_paper.php)
Supplement: Supplementary file 1 [file 123550494-supp.zip]

# TexMesh: Reconstructing Detailed Human Texture and Geometry from RGB-D Video

## Supplementary Material

Tiancheng Zhi<sup>1\*</sup>, Christoph Lassner<sup>2</sup>, Tony Tung<sup>2</sup>, Carsten Stoll<sup>2</sup>,  
Srinivasa G. Narasimhan<sup>1</sup>, and Minh Vo<sup>2</sup>

<sup>1</sup> Carnegie Mellon University, {tzhi,srinivas}@cs.cmu.edu

<sup>2</sup> Facebook Reality Labs, {classner,tony.tung,carsten.stoll,minh.vo}@fb.com

### 1 UV Mapping

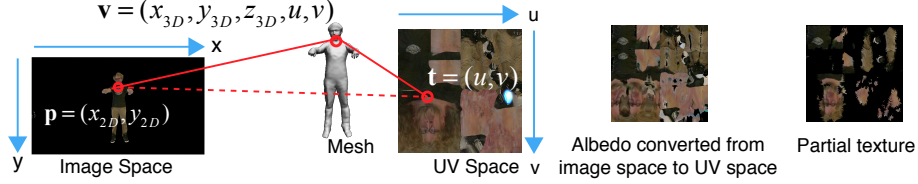

**Fig. 1.** The mesh bridges image space and UV space. Assume point  $\mathbf{v}$  on the mesh is associated with its 3D position  $(x_{3D}, y_{3D}, z_{3D})$  and UV coordinates  $(u, v)$ . The corresponding point  $\mathbf{p} = (x_{2D}, y_{2D})$  in image space can be obtained via camera projection. It also corresponds to point  $\mathbf{t} = (u, v)$  in UV space. To convert features from image space to UV space, for each  $\mathbf{t}$ , we first obtain its 3D position  $(x_{3D}, y_{3D}, z_{3D})$  by barycentric interpolation, project it to image coordinates  $(x_{2D}, y_{2D})$ , and finally sample features from the image.

We follow the common practice in graphics where texture is stored using a UV mapping [3]. This map unwraps a mesh into 2D space, called UV space. Each pixel  $\mathbf{t} = (u, v)$  in UV space corresponds to a point  $\mathbf{v}$  on the mesh. Its 3D position is defined by the barycentric interpolation of the vertices of the face where the point is on. With the 3D position, we can project it to the image space of a calibrated camera. Thus, we can sample image features and convert them into UV space. Fig. 1 shows an example of converting albedo to UV space. It is further converted into a partial texture by masking with visibility.

### 2 Visibility Map

To calculate visibility, as shown in Fig. 2, we rasterize a image with UV coordinates, then sample that to UV space, and compare with the correct UV

\* Work was done during TZ internship at Facebook Reality Labs, Sausalito, CA, USA.

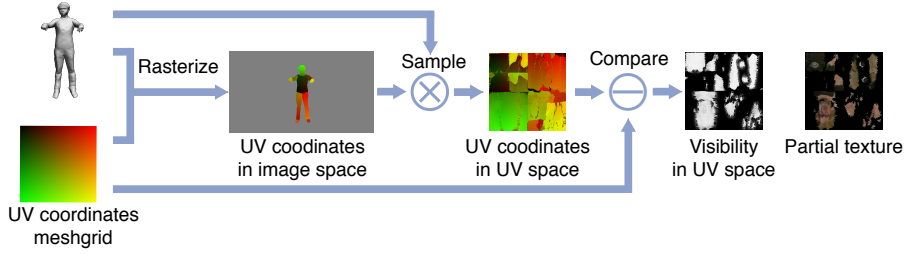

**Fig. 2.** Visibility and partial texture generation. By rasterizing UV coordinates to image space and sample it back to UV space, we obtain a UV coordinates map where only the visible parts are "correct". By comparing it with the ground truth UV meshgrid, we obtain the visibility map in UV space. We further calculate partial texture by masking the sampled albedo.

coordinates. The pixels whose sampled UVs are consistent with its position in UV space are visible. By masking the sampled albedo with visibility, we obtain the partial texture.

### 3 Augment MeshRef Features

In addition to VGG [8] features, we can further augment the features by including vertex position information. Specifically, we can rasterize coarse vertex position into both image space and UV space, to become a vertex position image  $I_{vp}$  and a vertex position map  $T_{vp}$ . We append  $I_{vp}$  to the input of VGGNet, and append  $T_{vp}$  to the input of the UV space CNN.

### 4 Implementation Details

**Network Architecture.** All the CNNs are U-Net sharing similar architectures, except for the VGG16 Network [8] in MeshRef module. See Tab. 1 for the shared components and Tab. 2, 3, and 4 for architectures of AlbeNorm, TexGen, and MeshRef CNNs. Specially, the CNN in TexGen predicts the residual between the coarse texture and the fine texture.

**Hyperparameters.** We use  $K = 30$  for the number of selected frames, and  $\lambda_a^{an} = 1, \lambda_n^{an} = 1, \lambda_{L1}^{tg} = 20, \lambda_{pct}^{tg} = 1, \lambda_{lap}^{tg} = 10, \lambda_{L1}^{mr1} = 1, \lambda_{ssim}^{mr1} = 1, \lambda_{lap}^{mr1} = 20, \lambda_{pct}^{mr2} = 1, \lambda_{sil}^{mr2} = 100, \lambda_{temp}^{mr2} = 10, \lambda_{pos}^{mr2} = 10, \lambda_{lap}^{mr2} = 10, \lambda_{deform}^{mr2} = 10$  for the loss weights. We use learning rate  $10^{-5}$  for pretraining AlbeNorm,  $10^{-4}$  for pretraining MeshRef,  $3 \times 10^{-4}$  for optimizing TexGen, and  $5 \times 10^{-5}$  for finetuning MeshRef. We use batch size 4 for pretraining AlbeNorm, 1 for pretraining MeshRef, 1 for optimizing TexGen, and 3 for finetuning MeshRef (as a triplet for motion smoothness loss). VGGNet is trained from scratch with MeshRef CNN,

**Table 1.** Network Components. We use ReLU [6] for activation, and Instance Normalization [9] for normalization

| Type    | Components                                                                                  |
|---------|---------------------------------------------------------------------------------------------|
| inconv  | $[\text{Conv}3\times3 + \text{ReLU} + \text{InstanceNorm}]\times2$                          |
| down    | $[\text{Conv}3\times3 + \text{ReLU} + \text{InstanceNorm}]\times2 + \text{MaxPool}2\times2$ |
| up      | Upsample + $[\text{Conv}3\times3 + \text{ReLU} + \text{InstanceNorm}]\times2$               |
| outconv | $\text{Conv}1\times1$                                                                       |

**Table 2.** Network Architecture of AlbeNorm CNN

| Name                  | Type    | Input           | Output Channels |
|-----------------------|---------|-----------------|-----------------|
| inc                   | inconv  | RGB+SH lighting | 64              |
| down1                 | down    | inc             | 128             |
| down2                 | down    | down1           | 256             |
| down3                 | down    | down2           | 512             |
| down4                 | down    | down3           | 512             |
| up1a                  | up      | down4, down3    | 256             |
| up2a                  | up      | up1a, down2     | 128             |
| up3a                  | up      | up2a, down1     | 64              |
| up4a                  | up      | up3a, inc       | 64              |
| outca (Normal Output) | up      | up4a            | 3               |
| up1b                  | up      | down4, down3    | 256             |
| up2b                  | up      | up1b, down2     | 128             |
| up3b                  | up      | up2b, down1     | 64              |
| up4b                  | up      | up3b, inc       | 64              |
| outcb (Albedo Output) | outconv | up4b            | 3               |

**Table 3.** Network Architecture of TexGen CNN

| Name  | Type    | Input          | Output Channels |
|-------|---------|----------------|-----------------|
| inc   | inconv  | Coarse Texture | 64              |
| down1 | down    | inc            | 128             |
| down2 | down    | down1          | 256             |
| down3 | down    | down2          | 512             |
| down4 | down    | down3          | 512             |
| up1   | up      | down4, down3   | 256             |
| up2   | up      | up1, down2     | 128             |
| up3   | up      | up2, down1     | 64              |
| up4   | up      | up3, inc       | 64              |
| outc  | outconv | up4            | 3               |

**Table 4.** Network Architecture of MeshRef CNN. “feat0”, “feat1”, “feat2”, “feat3”, “feat4” are features converted from VGGNet input, conv1\_2, conv2\_2, conv3\_3, and conv4\_3 features

| Name  | Type    | Input        | Output Channels |
|-------|---------|--------------|-----------------|
| inc   | inconv  | feat0        | 64              |
| down1 | down    | inc, feat1   | 128             |
| down2 | down    | down1, feat2 | 256             |
| down3 | down    | down2, feat3 | 512             |
| down4 | down    | down3, feat4 | 512             |
| up1   | up      | down4, down3 | 256             |
| up2   | up      | up1, down2   | 128             |
| up3   | up      | up2, down1   | 64              |
| up4   | up      | up3, inc     | 64              |
| outc  | outconv | up4          | 3               |

and kept fixed during finetuning. To speed up finetuning, we use a smaller image size  $480 \times 270$  for photometric losses, but the image features are from the  $960 \times 540$  original image.

**Adaptive Robust Perceptual Loss.** We use the adaptive robust loss [2] for perceptual losses [4]. We use VGG16 conv1\_2, conv2\_2, conv3\_3, and conv4\_3 features for TexGen, and conv3\_3, and conv4\_3 features for MeshRef. We use learning rate  $3 \times 10^{-4}$  for the adaptive robust function.

## 5 Qualitative Texture Generation Results

See Fig. 3 and 4 for qualitative results. Our method provides clearer texture, better contrast, and less baked-in shading.

## 6 Handle Different Human Models and Camera Parameters

We establish a mapping between SMPL [5] and Our Human Model, so that we can replace the initial meshes of DeepHuman [10] and HMD [11] by our coarse mesh. Besides, DeepHuman and HMD use different camera parameters from ours, and the cropping makes it hard to simply transform the mesh from one setting to the other. Thus, we adopt an approximate way to do this: We transform our coarse mesh to match the position and scale of their original initial mesh. Similarly, after obtaining their reconstruction result, we transform the mesh to match the position and scale of our coarse mesh, for DeepHuman, HMD, and their variants.

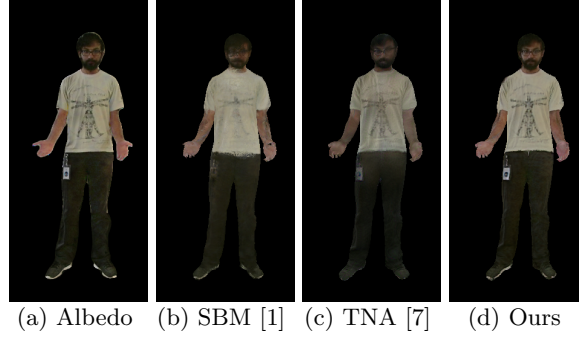

**Fig. 3.** Comparing texture generation by visualizing no-shading image on real data. (a) is albedo image from AlbeNorm, which can be seen as “ground truth”. Our result has clearer texture, and less baked-in shading.

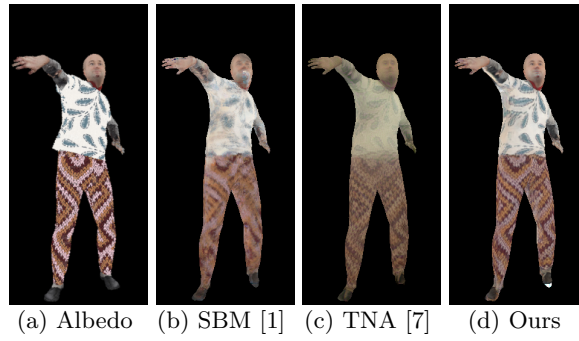

**Fig. 4.** Comparing texture generation by visualizing no-shading image on synthetic data. (a) is ground truth albedo image. Our result has better contrast and clearer texture.

## References

1. Alldieck, T., Magnor, M., Xu, W., Theobalt, C., Pons-Moll, G.: Video based reconstruction of 3d people models. In: CVPR (2018)
2. Barron, J.T.: A general and adaptive robust loss function. In: CVPR (2019)
3. Blinn, J.F., Newell, M.E.: Texture and reflection in computer generated images. *Communications of the ACM* **19**(10), 542–547 (1976)
4. Johnson, J., Alahi, A., Fei-Fei, L.: Perceptual losses for real-time style transfer and super-resolution. In: ECCV (2016)
5. Loper, M., Mahmood, N., Romero, J., Pons-Moll, G., Black, M.J.: Smpl: A skinned multi-person linear model. *TOG* **34**(6), 1–16 (2015)
6. Nair, V., Hinton, G.E.: Rectified linear units improve restricted boltzmann machines. In: ICML (2010)
7. Shysheya, A., Zakharov, E., Aliev, K.A., Bashirov, R., Burkov, E., Iskakov, K., Ivakhnenko, A., Malkov, Y., Pasechnik, I., Ulyanov, D., et al.: Textured neural avatars. In: CVPR (2019)
8. Simonyan, K., Zisserman, A.: Very deep convolutional networks for large-scale image recognition. In: ICLR (2015)
9. Ulyanov, D., Vedaldi, A., Lempitsky, V.: Instance normalization: The missing ingredient for fast stylization. *arXiv preprint arXiv:1607.08022* (2016)
10. Zheng, Z., Yu, T., Wei, Y., Dai, Q., Liu, Y.: Deephuman: 3d human reconstruction from a single image. In: ICCV (2019)
11. Zhu, H., Zuo, X., Wang, S., Cao, X., Yang, R.: Detailed human shape estimation from a single image by hierarchical mesh deformation. In: CVPR (2019)
