# Supplementary material
Source: ML conference proceedings conference paper supplement (https://www.ecva.net/papers/eccv_2020/papers_ECCV/html/123550494_ECCV_2020_paper.php)
Supplement: Supplementary file 2 [file 123550494-supp.zip › 1152-supp/README.txt]

1152-supp.pdf: Main PDF supplementary material
1152-supp.mp4: Supplementary video
Codec: mp4, H.264
Codec URL (Windows): https://www.windows10codecpack.com/
Codec URL (Mac): https://iina.io/
